# Supplementary material for: Expression Profile of Drug and Nutrient Absorption Related Genes in Madin-Darby Canine Kidney (MDCK) Cells Grown under Differentiation Conditions
Source: PubMed Central journal article supplement (PMC3834914; doi:10.3390/pharmaceutics4020314), 2012-06-18
Supplement: pharmaceutics-04-00314-s001.pdf [file pharmaceutics-04-00314-s001.pdf]

# Supporting Information

**Table S1.** List of confirmed SLC transporters represented in Canine GeneChip.

| SLC family                                                                       | Members detected                                                  | Members not detected                                   |
|----------------------------------------------------------------------------------|-------------------------------------------------------------------|--------------------------------------------------------|
| SLC1: The high affinity glutamate and neutral amino acid transporter family      | SLC1A1                                                            | SLC1A2, SLC1A3, SLC1A6                                 |
| SLC2: The facilitative GLUT transporter family                                   | SLC2A1, SLC2A8                                                    | SLC2A3, SLC2A9                                         |
| SLC3: The heavy subunits of the heteromeric amino acid transporters              |                                                                   | SLC3A1                                                 |
| SLC4: The bicarbonate transporter family                                         | SLC4A11                                                           | SLC4A4, SLC4A8                                         |
| SLC5: The sodium glucose cotransporter family                                    | SLC5A6                                                            | SLC5A3, SLC5A10, SLC5A12                               |
| SLC6: The sodium- and chloride- dependent neurotransmitter transporter family    | SLC6A6, SLC6A12                                                   | SLCA18                                                 |
| SLC7: The cationic amino acid transporter/glycoprotein-associated family         | NR                                                                |                                                        |
| SLC8: The Na <sup>+</sup> /Ca <sup>2+</sup> exchanger family                     |                                                                   | SLC8A1                                                 |
| SLC9: The Na <sup>+</sup> /H <sup>+</sup> exchanger family                       |                                                                   | SLC9A1, SLC9A6, SLC9A9                                 |
| SLC10: The sodium bile salt cotransport family                                   |                                                                   | SLC10A2                                                |
| SLC11: The proton coupled metal ion transporter family                           | NR                                                                |                                                        |
| SLC12: The electroneutral cation-Cl cotransporter family                         |                                                                   | SLC12A3, SLC12A6, SLC12A8                              |
| SLC13: The human Na <sup>+</sup> -sulfate/carboxylate cotransporter family       |                                                                   | SLC13A2                                                |
| SLC14: The urea transporter family                                               | NR                                                                |                                                        |
| SLC15: The proton oligopeptide cotransporter family                              | SLC15A2, SLC15A4                                                  | SLC15A1                                                |
| SLC16: The monocarboxylate transporter family                                    | SLC16A13                                                          | SLC16A4                                                |
| SLC17: The vesicular glutamate transporter family                                |                                                                   | SLC17A3, SLC17A7                                       |
| SLC18: The vesicular amine transporter family                                    | NR                                                                |                                                        |
| SLC19: The folate/thiamine transporter family                                    | NR                                                                |                                                        |
| SLC20: The type III Na <sup>+</sup> -phosphate cotransporter family              | NR                                                                |                                                        |
| SLC21/SLCO: The organic anion transporting family                                |                                                                   | SLC21A3, SLC21A8, SLC21A15                             |
| SLC22: The organic cation/anion/zwitterion transporter family                    | SLC22A2                                                           | SLC22A1, SLC22A3, SLC22A6, SLC22A9, SLC22A16, SLC22A17 |
| SLC23: The Na <sup>+</sup> -dependent ascorbic acid transporter family           |                                                                   | SLC23A2                                                |
| SLC24: The Na <sup>+</sup> /(Ca <sup>2+</sup> -K <sup>+</sup> ) exchanger family |                                                                   | SLC24A2                                                |
| SLC25: The mitochondrial carrier family                                          | SLC25A4, SLC25A5, SLC25A6, SLC25A12, SLC25A26, SLC25A36, SLC25A37 |                                                        |
| SLC26: The multifunctional anion exchanger family                                | SLC26A6, SLC26A11                                                 | SLC26A8                                                |
| SLC27: The fatty acid transport protein family                                   |                                                                   | SLC27A5                                                |
| SLC28: The Na <sup>+</sup> -coupled nucleoside transport family                  | NR                                                                |                                                        |
| SLC29: The facilitative nucleoside transporter family                            | SLC29A1                                                           |                                                        |
| SLC30: The zinc efflux family                                                    |                                                                   | SLC30A2, SLC30A3                                       |
| SLC31: The copper transporter family                                             | NR                                                                |                                                        |

**Table S1. Cont.**

| SLC family                                                                       | Members detected                               | Members not detected |
|----------------------------------------------------------------------------------|------------------------------------------------|----------------------|
| SLC32: The vesicular inhibitory amino acid transporter family                    | NR                                             |                      |
| SLC33: The Acety-CoA transporter family                                          | NR                                             |                      |
| SLC34: The type II Na <sup>+</sup> -phosphate cotransporter family               | NR                                             |                      |
| SLC35: The nucleoside-sugar transporter family                                   | SLC35A1, SLC35A3, SLC35B1,<br>SLC35C1, SLC35E2 | SLC35A2,<br>SLC35F1  |
| SLC36: The proton-coupled amino acid transporter family                          | NR                                             |                      |
| SLC37: The sugar-phosphate/phosphate exchanger family                            | SLC37A4                                        |                      |
| SLC38: The System A & N, sodium-coupled neutral amino acid transporter family    | SLC38A1, SLC38A2                               | SLC38A3              |
| SLC39: The metal ion transporter family                                          | SLC39A6, SLC39A10, SLC39A13                    | SLC39A12             |
| SLC40: The basolateral iron transporter family                                   | SLC40A1                                        |                      |
| SLC41: The MgtE-like magnesium transporter family                                | SLC41A2                                        | SLC41A3              |
| SLC42: The Rh ammonium transporter family (pending)                              | NR                                             |                      |
| SLC43: Na <sup>+</sup> -independent, system-L like amino acid transporter family | SLC43A2                                        | SLC43A3              |
| SLC44: Choline-like transporter family                                           | NR                                             |                      |
| SLC45: Putative sugar transporter family                                         | NR                                             |                      |
| SLC46: Heme transporter family                                                   | NR                                             |                      |
| SLC47: Multidrug and toxin extrusion family                                      | NR                                             |                      |

NR: confirmed probesets not represented on the Canine GeneChip.

**Table S2.** Top genes whose expression changed significantly from 3 to 5 days in cells grown on transwells. There were only 6 genes whose expression decreased for more than 2-fold from 3 to 5 days, and only 7 genes whose expression were turned-off from 3 to 5 days.

| Gene symbol                      | RefSeq ID    | Gene Name                                            | Function                                                                               | 5d-T/3d-T |
|----------------------------------|--------------|------------------------------------------------------|----------------------------------------------------------------------------------------|-----------|
| <b>Top 10 genes up-regulated</b> |              |                                                      |                                                                                        |           |
| OAS2                             | XM_848678    | 2',5'-oligoadenylate synthetase 2 isoform p69        | metabolism                                                                             | 4.1       |
| G1P2                             | XM_536714    | interferon alpha-inducible protein                   | proliferation                                                                          | 3.8       |
| S100A2                           | XM_850065    | S100 calcium-binding protein A2                      | cell cycle progression and differentiation                                             | 3.1       |
| EPSTI1                           | XM_534132    | epithelial stromal interaction 1                     | unknown                                                                                | 3         |
| FABP3                            | XM_535331    | Fatty acid-binding protein, heart (H-FABP)           | negative regulation of cell proliferation                                              | 3         |
| FOS                              | XM_547914    | Proto-oncogene protein c-fos                         | Transcription factor that regulates proliferation, differentiation, and transformation | 2.9       |
| TIMP1                            | NM_001003182 | Tissue inhibitor of metallopeptidase-1               | promote cell proliferation, inhibitors of MMPs                                         | 2.9       |
| FST                              | XM_536475    | Follistatin precursor (FS) (Activin-binding protein) | negative regulation of FSH secretion                                                   | 2.8       |

**Table S2. Cont.**

| Gene symbol                       | RefSeq ID    | Gene Name                                                           | Function                                                             | 5d-T/3d-T |
|-----------------------------------|--------------|---------------------------------------------------------------------|----------------------------------------------------------------------|-----------|
| CTGF                              | XM_533406    | connective tissue growth factor                                     | adhesion, apoptosis, differentiation, proliferation                  | 2.8       |
| PSMB8                             | XM_532100    | Proteasome subunit beta type 8 precursor (Proteasome component C13) | proteolysis; ubiquitin-dependent protein catabolism; immune response | 2.7       |
| <b>Top 6 genes down-regulated</b> |              |                                                                     |                                                                      |           |
| Vav3 oncogene                     | XM_537047    | Vav-3 protein                                                       | intracellular signaling cascade                                      | -2.4      |
| FAM36A                            | XM_537221    | family with sequence similarity 36, member A                        | unknown                                                              | -2.1      |
| SULT1A2                           | NM_001003223 | sulfotransferase family 1A member 2                                 | metabolism                                                           | -2.1      |
| STEAP1                            | XM_532454    | Six transmembrane epithelial antigen of prostate 1                  | channel or pore class transporter                                    | -2.1      |
| RDM1                              | XM_537910    | RAD52 Motif 1                                                       | DNA binding and repair                                               | -2.1      |
| PDGFRL                            | XM_843577    | platelet-derived growth factor receptor-like protein                | tumor suppressor                                                     | -2        |
| <b>Top 10 genes turned-on</b>     |              |                                                                     |                                                                      |           |
| ALDOB                             | XM_532017    | Fructose-bisphosphate aldolase B                                    | metabolism                                                           |           |
| CCL17                             | NM_001003051 | chemokine (C-C motif) ligand 17                                     | signaling                                                            |           |
| IDO                               | XM_532793    | Indoleamine 2,3-dioxygenase                                         | anti-proliferate                                                     |           |
| AMACO                             | XM_535021    | A-domain containing protein similar to matrilin and collagen        | differentiation                                                      |           |
| B4GALT1                           | XM_538701    | UDP-Gal:β-GlcNAc β-1,4-galactosyltransferase 1                      | metabolism                                                           |           |
| CSF2                              | NM_001003245 | colony stimulating factor 2 (granulocyte-macrophage)                | cellular defense response; signal transduction                       |           |
| transgelin                        | XM_536561    | transgelin                                                          | actin binding                                                        |           |
| EMP-3                             | XM_541523    | Epithelial membrane protein-3                                       | proliferation                                                        |           |
| HMIC                              | XM_535351    | mannosyl-oligosaccharide 1,2-α-mannosidase IC                       | metabolism                                                           |           |
| FYN oncogene                      | XM_532267    | protein-tyrosine kinase fyn isoform c                               | signal transduction, proliferation, apoptosis                        |           |
| <b>Top 7 genes turned-off</b>     |              |                                                                     |                                                                      |           |
| ADH4                              | XM_535665    | alcohol dehydrogenase class II pi chain precursor                   | metabolism                                                           |           |
| SAMD11                            | XM_536715    | sterile α motif domain containing 11                                | unknown                                                              |           |
| CHFR                              | XM_534631    | checkpoint with forkhead and ring finger domains                    | cell cycle                                                           |           |
| ENTPD5                            | XM_537507    | ectonucleoside triphosphate diphosphohydrolase 5 precursor          | extracellular nucleotides catabolism                                 |           |
| PCDH9                             | XM_534142    | protocadherin 9 isoform 1 precursor                                 | cell adhesion                                                        |           |
| EGF                               | NM_001003094 | epidermal growth factor                                             | cell proliferation, etc.                                             |           |
| C6ORF71                           | XM_533449    | chromosome 6 open reading frame 71                                  | unknown                                                              |           |
